# Supplementary material for: Pyrenyl substituted 1,8-naphthalimide as a new material for weak efficiency-roll-off red OLEDs: a theoretical and experimental study
Source: Royal Society of Chemistry journal article supplement (doi:10.1039/c8nj01866a), 2018-01-01

**Electronic Supplementary data for**  
**Pyrenyl Substituted 1,8-Naphthalimide as a New Material for Weak**  
**Efficiency-roll-off Red OLED: A Theoretical and Experimental Study**

Oleksandr Bezikonnyj<sup>a,b</sup>, Dalius Gudeika<sup>a,c</sup>, Dmytro Volyniuk<sup>a</sup>, Juozas V. Grazulevicius<sup>a</sup>,  
Gintautas Bagdziunas<sup>d,e†</sup>

<sup>a</sup>*Santaka Valley, Kaunas University of Technology, K. Barsausko Str. 59, LT-51423, Kaunas, Lithuania*

<sup>b</sup>*Experimental Physics Department, Faculty of Physics, Taras Shevchenko National University of Kyiv, pros. Akademika Glushkova 4b, Kyiv, Ukraine*

<sup>c</sup>*Institute of Solid State Physics, University of Latvia, Kengaraga st. 8, Riga, Latvia*

<sup>d</sup>*Department of Material Science and Electrical Engineering, Laboratory of Nanotechnology, Center for Physical Sciences and Technology, Sauletekio av. 3, Lithuania*

<sup>e</sup>*Department of Physical Chemistry, Vilnius University, Faculty of Chemistry and Geosciences, Naugarduko str. 24, Vilnius, Lithuania*

**Corresponding Authors:**

Dr. G. Bagdziunas (ORCID ID: [orcid.org/0000-0002-9924-6902](https://orcid.org/0000-0002-9924-6902)), E-mail:  
[gintautas.bagdziunas@ftmc.lt](mailto:gintautas.bagdziunas@ftmc.lt)

**Table of Contents**

|                                                        |   |
|--------------------------------------------------------|---|
| Additional data of XRD analysis .....                  | 2 |
| Additional data of thermal analysis of ImPy .....      | 3 |
| Additional data of electrical properties of ImPy ..... | 4 |
| Additional properties of electroemission .....         | 6 |
| NMR, FT-IR and MS spectra of ImPy .....                | 8 |

**Additional data of XRD analysis****Table S1.** Data of crystal analysis of compound **ImPy** structure.

|                              |                                                                                                                                                                          |
|------------------------------|--------------------------------------------------------------------------------------------------------------------------------------------------------------------------|
| Empirical Formula            | C <sub>36</sub> H <sub>31</sub> NO <sub>2</sub> xTHF                                                                                                                     |
| Crystal Color, Habit         | yellow platelet                                                                                                                                                          |
| Crystal Dimensions           | 0.540 x 0.390 x 0.120 mm                                                                                                                                                 |
| Crystal System/ Lattice Type | triclinic                                                                                                                                                                |
| Lattice Parameters           | a = 9.290(13) Å<br>α = 78.37(4) <sup>o</sup><br>b = 12.67(2) Å<br>β = 79.43(5) <sup>o</sup><br>c = 13.43(2) Å<br>γ = 89.40(6) <sup>o</sup><br>V = 1521(4) Å <sup>3</sup> |
| Space Group                  | P-1 (#2)                                                                                                                                                                 |
| Z value                      | 2                                                                                                                                                                        |
| d <sub>calc</sub>            | 1.113 g/cm <sup>3</sup>                                                                                                                                                  |
| R1 <sup>a</sup>              | 0.1802                                                                                                                                                                   |
| wR2 <sup>b</sup>             | 0.5179                                                                                                                                                                   |

<sup>a</sup>  $R1 = \sum ||Fo| - |Fc|| / \sum |Fo|$

<sup>b</sup>  $wR2 = [\sum (w (Fo^2 - Fc^2)^2) / \sum w(Fo^2)^2]^{1/2}$

### Additional data of thermal analysis of **ImPy**

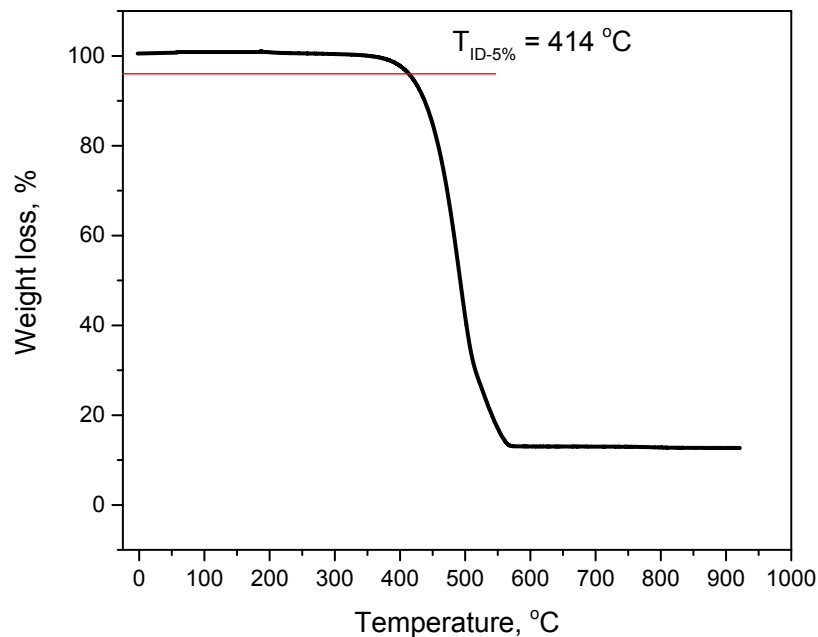

**Fig. S1.** TGA thermogram of compound **ImPy** (scan rate of  $20\text{ °C min}^{-1}$ ,  $N_2$  atmosphere).

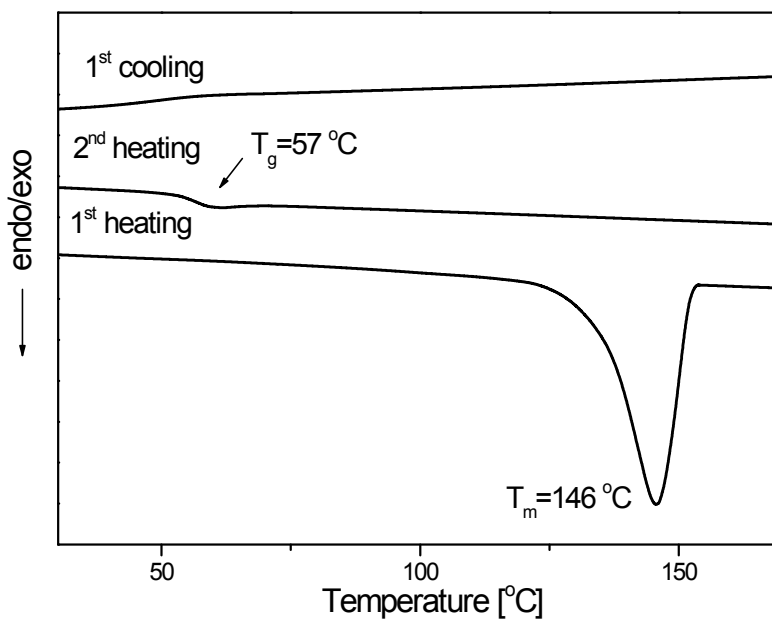

**Fig. S2.** DSC thermograms of compound **ImPy** (scan rate of  $10\text{ °C min}^{-1}$ ,  $N_2$  atmosphere).

### Additional data of electrical properties of ImPy

**Table S2.** Estimated distances between the acceptor and donor moieties, transfer integrals and external and internal reorganisation energies of the **ImPy** compound.

| Entry | $d_{D-D}$ / Å | $d_{A-A}$ / Å | H(h <sup>+</sup> ) / H(e <sup>-</sup> ) / meV | $\lambda_{\text{ext}}(\text{h}^+)/$<br>meV | $\lambda_{\text{ext}}(\text{e}^-)/$<br>meV | -E <sub>i</sub> / kJ mol <sup>-1</sup> |
|-------|---------------|---------------|-----------------------------------------------|--------------------------------------------|--------------------------------------------|----------------------------------------|
| 1     | 9.4           | 9.4           | 19/ 111                                       | 4.0/ 4.0                                   |                                            | 29.4                                   |
| 2     | 14.2          | 3.9           | 5.7/ 15.6                                     | 6.5/ 0                                     |                                            | 52.2                                   |
| 3     | 5.8           | 12.8          | 14.4/ 2.3                                     | 0/ 6.0                                     |                                            | 44.3                                   |
| 4     | 21.5          | 12.6          | 21/ 18                                        | 8.1/ 5.9                                   |                                            | 32.9                                   |

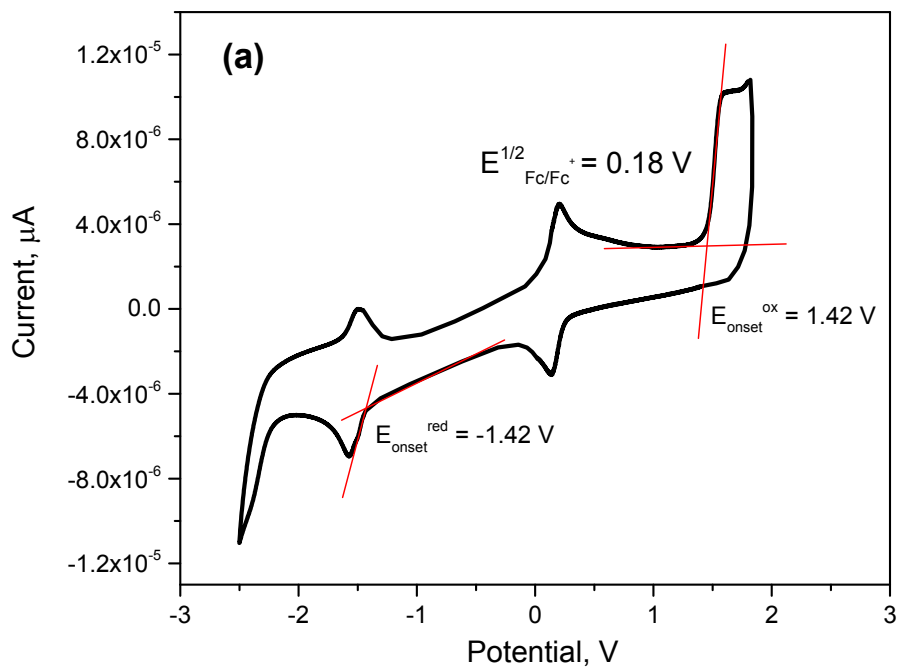

**Fig. S3.** Electrochemical cyclic voltammogram of **ImPy** in acetonitrile with 0.1 M TBAPF<sub>6</sub> supporting electrolyte at 50 mVs<sup>-1</sup> scan rate.

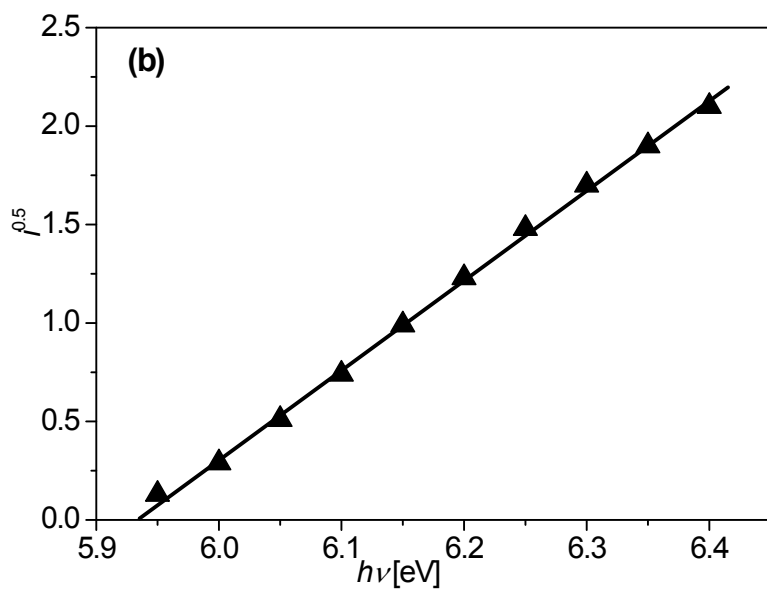

**Fig. S4.** Electron photoemission spectra of the layer of **ImPy**.

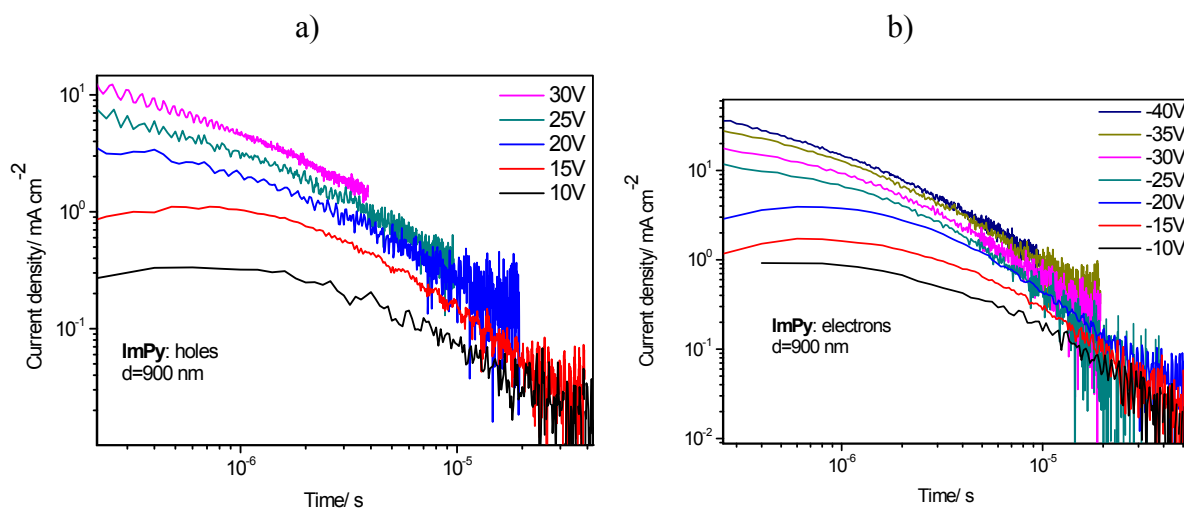

**Fig. S5.** TOF transients for hole (a) and electron (b) transport for compound **ImPy**.

### Additional properties of electroemission

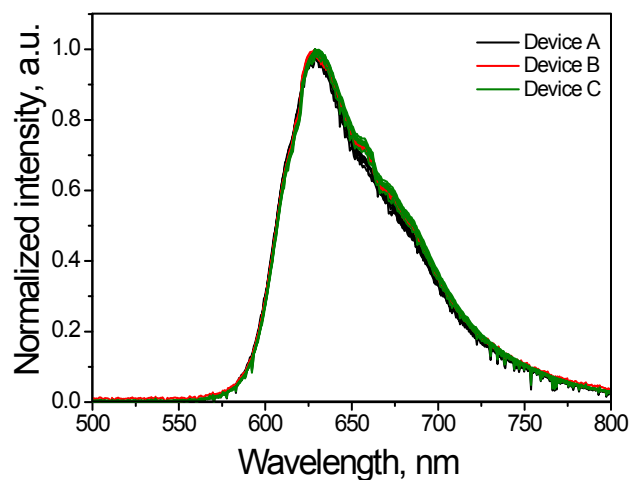

**Fig. S6.** Electroemission of A-C devices.

**Table S3.** Selected device performances.

| Device | Structure                                                                            | $V_{on}^a$ /<br>V | Max.<br>brightness<br>/ $\text{Cd m}^{-2}$ | Max.<br>$\eta_c$ /<br>$\text{Cd A}^{-1}$ | Max. $\eta_p$ /<br>$\text{Lm W}^{-1}$ | Max.<br>EQE/<br>% |
|--------|--------------------------------------------------------------------------------------|-------------------|--------------------------------------------|------------------------------------------|---------------------------------------|-------------------|
| A      | ITO/MoO <sub>3</sub> (/NPB<br>/Ir(piq) <sub>2</sub> (acac)(10%):ImPy<br>/TPBi/LiF/Al | 3.5               | 15300                                      | 10.8                                     | 7.1                                   | 13.6              |
| B      | ITO/MoO <sub>3</sub> (/NPB<br>/Ir(piq) <sub>2</sub> (acac)(15%):ImPy<br>/TPBi/LiF/Al | 3.5               | 14900                                      | 9.7                                      | 6.6                                   | 12.6              |
| C      | ITO/MoO <sub>3</sub> (/NPB<br>/Ir(piq) <sub>2</sub> (acac)(25%):ImPy<br>/TPBi/LiF/Al | 3.7               | 12000                                      | 5.2                                      | 2.7                                   | 7.0               |

a The operating voltage at a brightness of  $1 \text{ Cd m}^2$ .

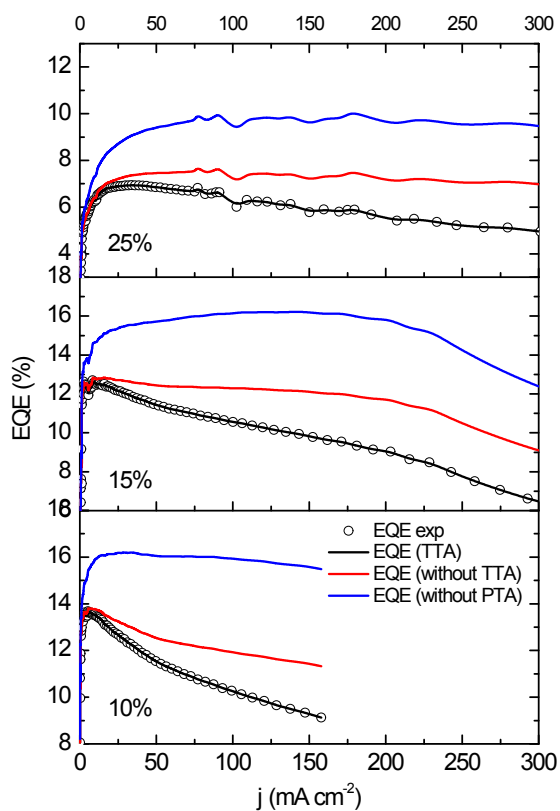

**Fig. S7.** Measured (scatter) and fitted EQE (black curves) versus the current density characteristics of the devices at the concentrations of 10, 15 and 25% of Ir(piq)<sub>2</sub>(acac) in the host. The red curves represent EQE<sub>0</sub> in absence of TTA and the blue curves represent EQE<sub>0</sub> in absence of TPQ.

# NMR, FT-IR and MS spectra of ImPy

## $^1\text{H}$ -NMR of ImPy

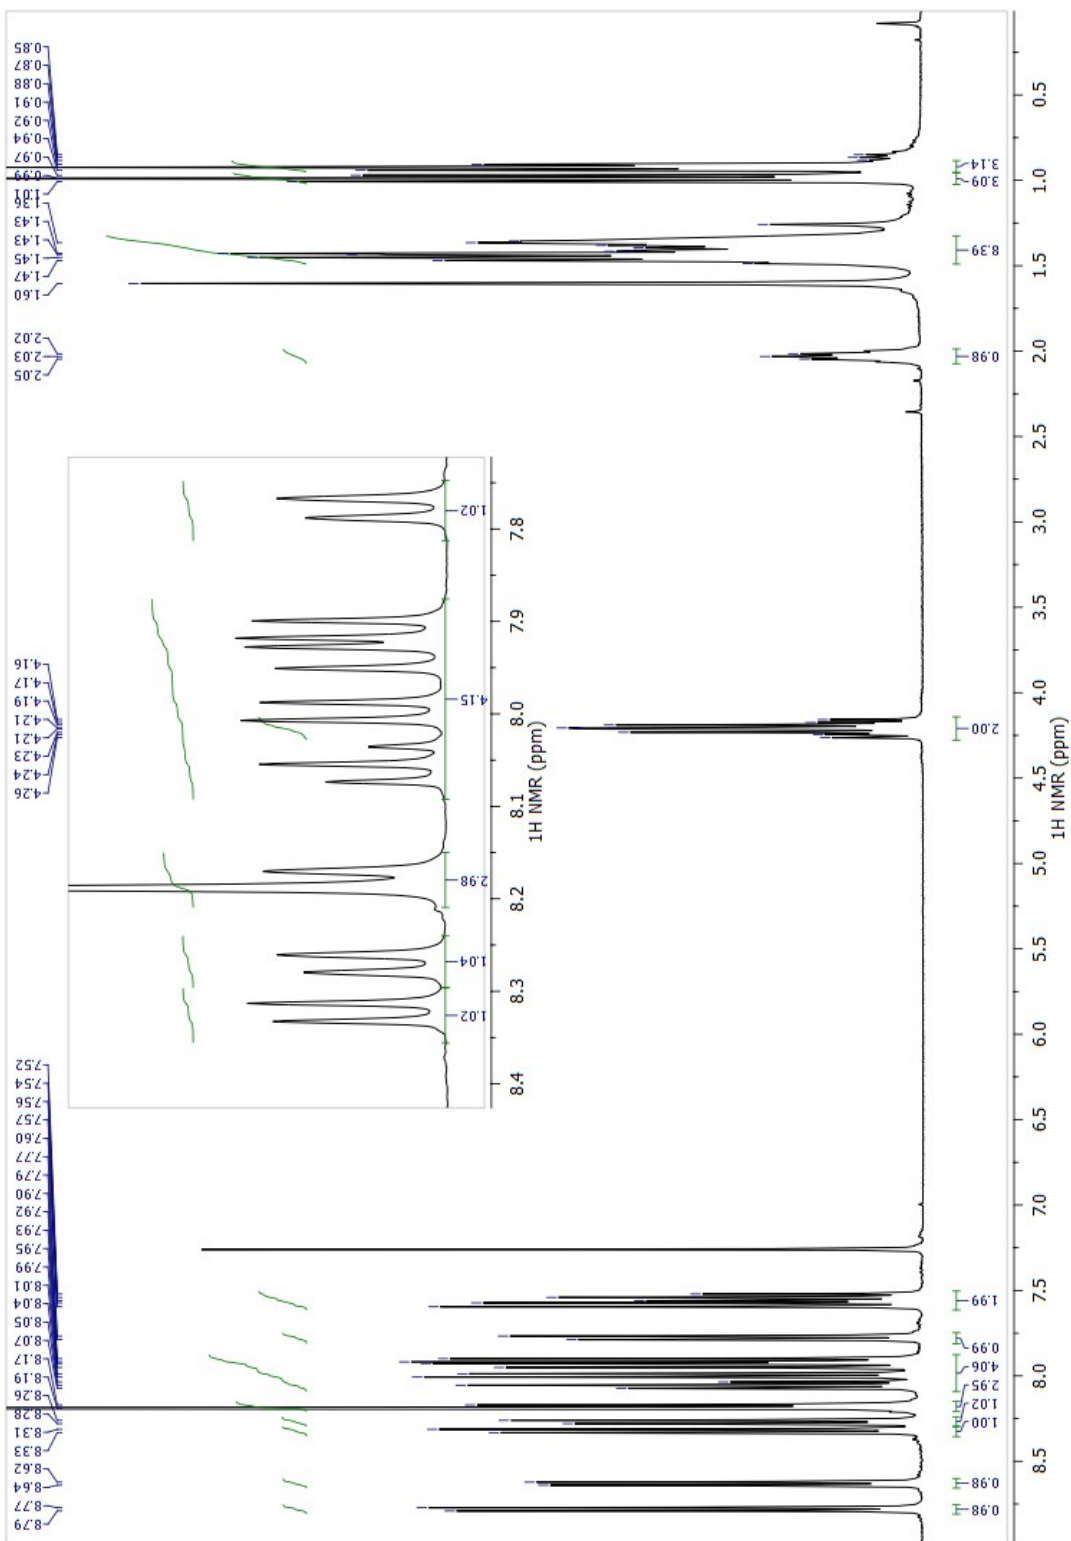



<sup>13</sup>C-NMR of ImPy

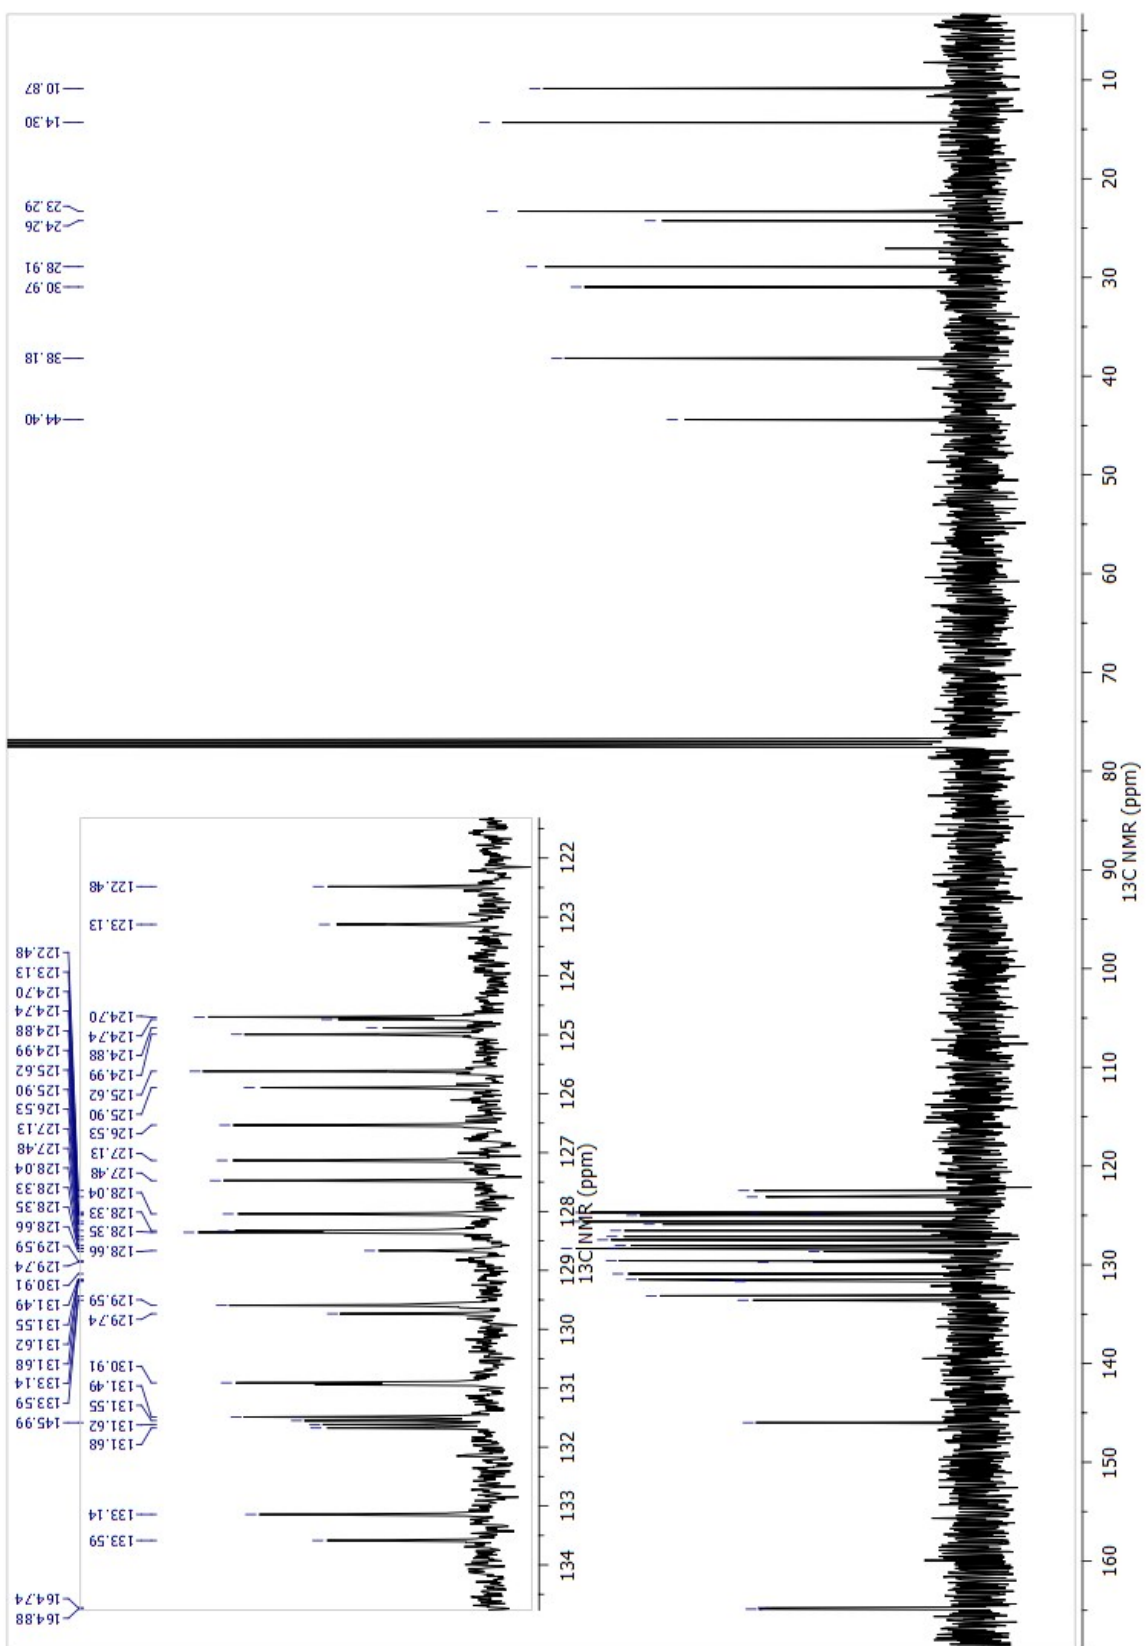

## FT-IR of ImPy

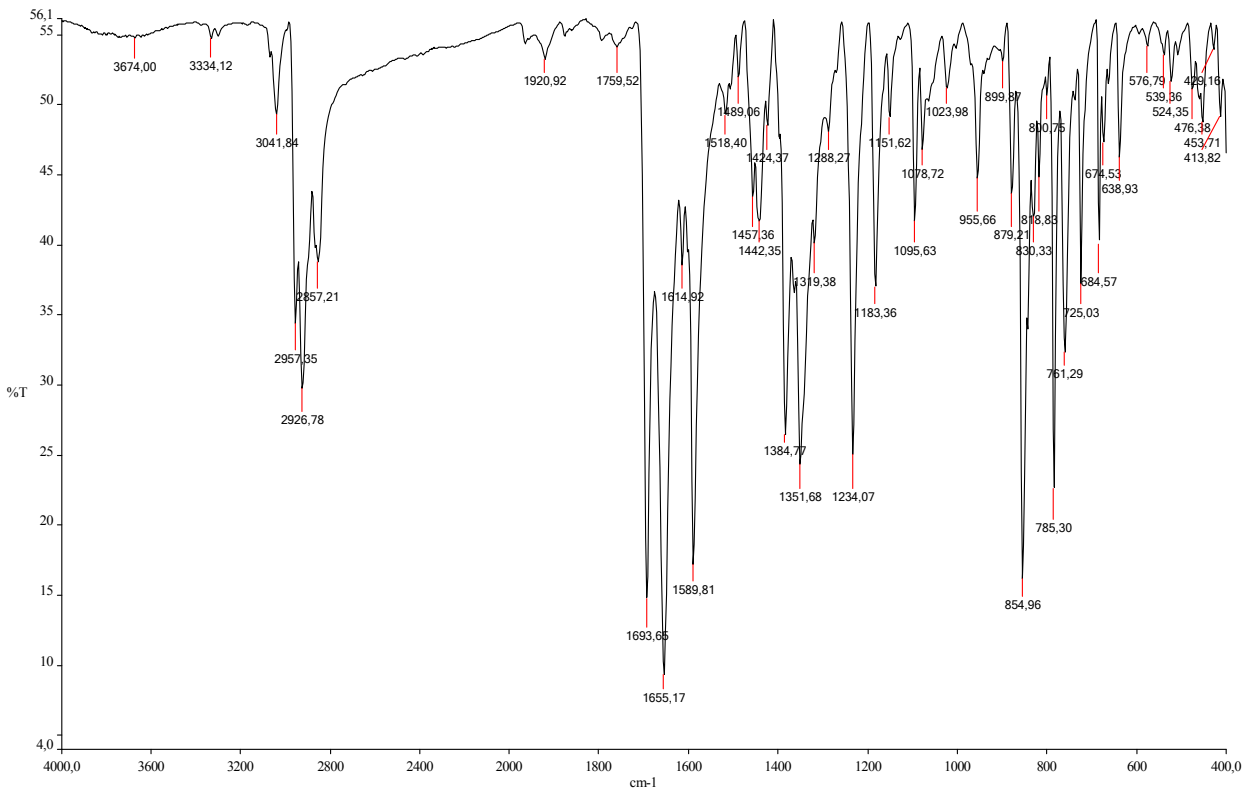

## Mass of ImPy

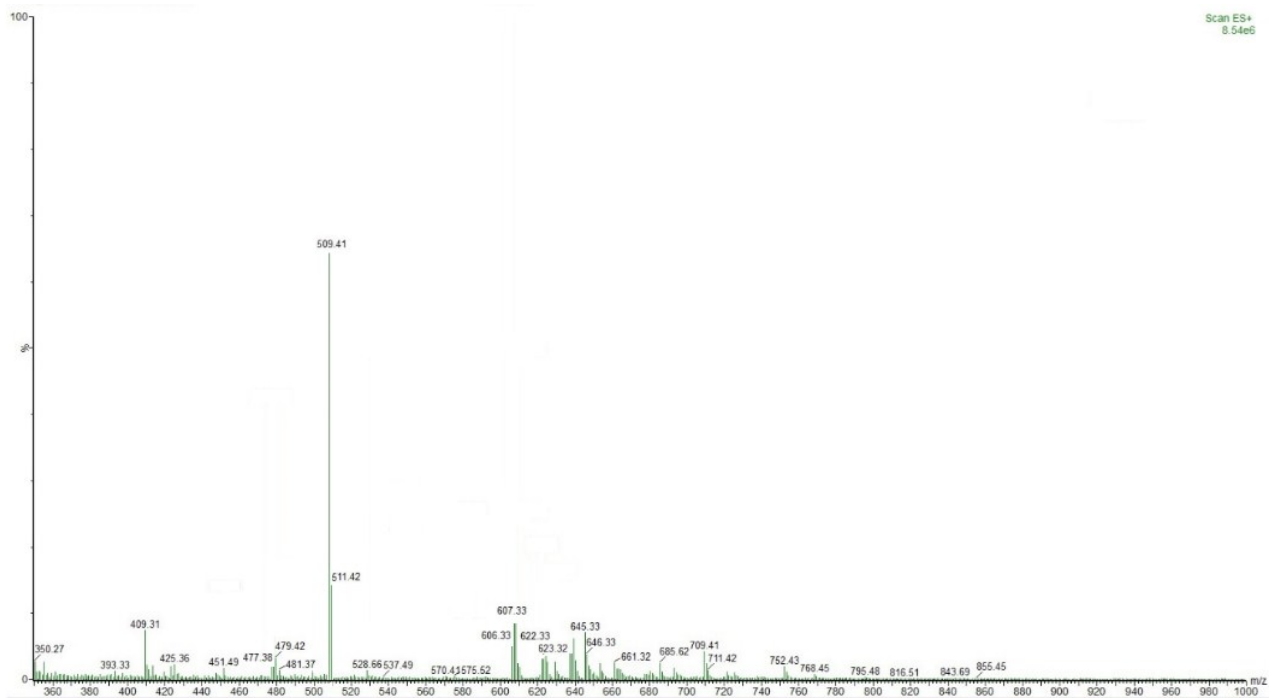

Supplement: c8nj01866a2.pdf [file c8nj01866a2.pdf]
